# Supplementary material for: Genetic Diversity in Invasive Populations of Argentine Stem Weevil Associated with Adaptation to Biocontrol
Source: MDPI journal article supplement (doi:10.3390/insects11070441), 2020-07-14
Supplement: s1 [file s1]

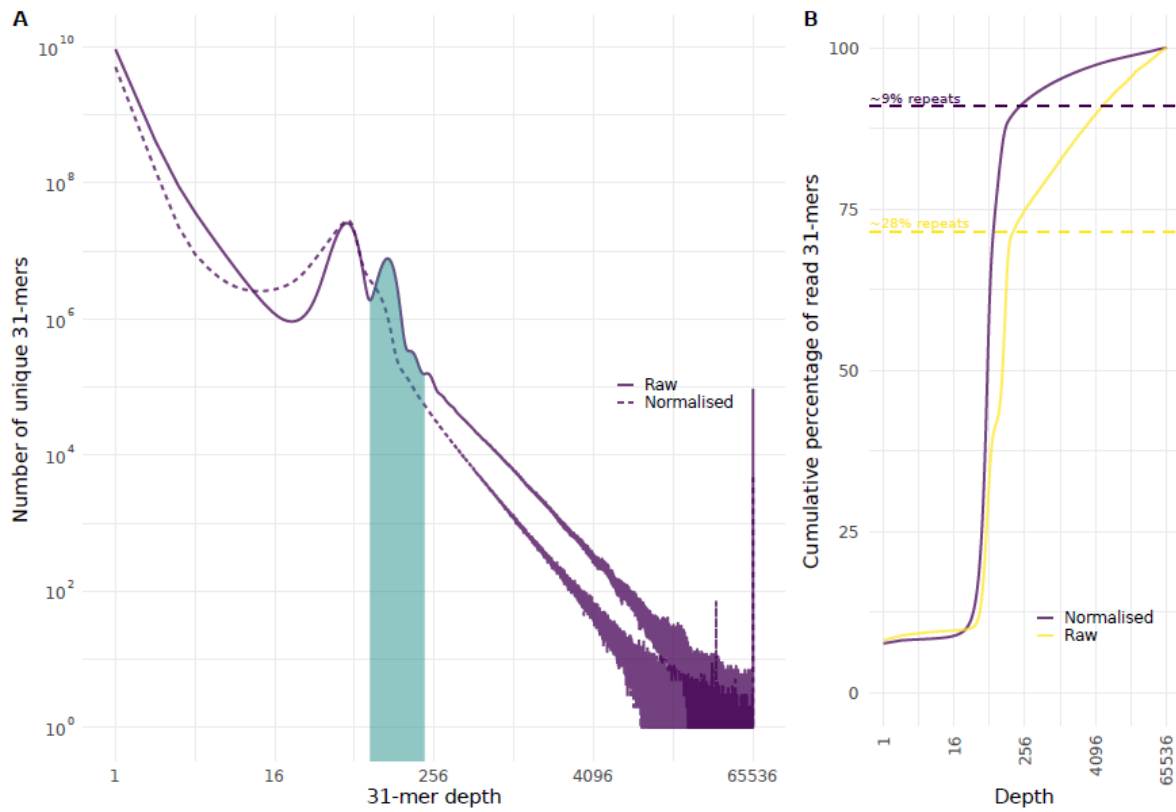

**Figure S1.** k-mer analysis of the short read sequencing dataset at  $k = 31$ . **A** k-mer distribution in the short read dataset before and after normalisation. The peak at 84–216× coverage (highlighted in green) suggests a diploid genome with a haploid size of 967 Mb. The haploid peak (22–56× coverage) indicates a high number of polymorphic sites in the single, male individual used to generate this dataset. BBTools [25] estimated 2.1 polymorphisms per 100 bp in this dataset. **B** Cumulative percentage of all k-mers vs. frequency. 72% of all k-mers are at 216× or lower coverage, indicating that the remaining 28% of k-mers are repetitive. The earlier inflexion point at 48% suggests that k-mers in the region from 48–72% may also be from repetitive regions.
