# Supplementary material for: Genetic Diversity in Invasive Populations of Argentine Stem Weevil Associated with Adaptation to Biocontrol
Source: MDPI journal article supplement (doi:10.3390/insects11070441), 2020-07-14
Supplement: s1 [file s1]

**Table S1.** Repeat content of the subset draft assembly. We used RepeatModeler to detect repeats and the Dfam\_3.1 Combined Database with RepeatClassifier to classify them [33,50], then used RepeatMasker to locate repeats in the assembly [35]. 1: Most repeats fragmented by insertions or deletions have been counted as one element.

|                                    | Number of elements <sup>1</sup> | Length       | Percentage occupied of sequence |
|------------------------------------|---------------------------------|--------------|---------------------------------|
| Retroelements                      | 208423                          | 102784249 bp | 9.24 %                          |
| SINEs:                             | 0                               | 0 bp         | 0.00 %                          |
| Penelope                           | 36938                           | 13813895 bp  | 1.24 %                          |
| LINEs:                             | 191930                          | 88657653 bp  | 7.97 %                          |
| CRE/SLACS                          | 0                               | 0 bp         | 0.00 %                          |
| L2/CR1/Rex                         | 63334                           | 24555690 bp  | 2.21 %                          |
| R1/LOA/Jockey                      | 4526                            | 2934064 bp   | 0.26 %                          |
| R2/R4/NeSL                         | 1736                            | 1662589 bp   | 0.15 %                          |
| RTE/Bov-B                          | 13972                           | 4650200 bp   | 0.42 %                          |
| L1/CIN4                            | 0                               | 0 bp         | 0.00 %                          |
| LTR elements:                      | 16493                           | 14126596 bp  | 1.27 %                          |
| BEL/Pao                            | 3775                            | 2519145 bp   | 0.23 %                          |
| Ty1/Copia                          | 344                             | 270624 bp    | 0.02 %                          |
| Gypsy/DIRS1                        | 12155                           | 11090256 bp  | 1.00 %                          |
| Retroviral                         | 0                               | 0 bp         | 0.00 %                          |
| DNA transposons                    | 259238                          | 83605564 bp  | 7.52 %                          |
| hobo-Activator                     | 35507                           | 7694409 bp   | 0.69 %                          |
| Tc1-IS630-Pogo                     | 151555                          | 51159902 bp  | 4.60 %                          |
| En-Spm                             | 0                               | 0 bp         | 0.00 %                          |
| MuDR-IS905                         | 0                               | 0 bp         | 0.00 %                          |
| PiggyBac                           | 4495                            | 1270461 bp   | 0.11 %                          |
| Tourist/Harbinger                  | 9472                            | 1631942 bp   | 0.15 %                          |
| Other (Mirage, P-element, Transib) | 2578                            | 1135450 bp   | 0.10 %                          |
| Rolling-circles                    | 64570                           | 11870671 bp  | 1.07 %                          |
| Unclassified:                      | 2562568                         | 583055017 bp | 52.41 %                         |
| Total interspersed repeats:        |                                 | 769444830 bp | 69.17 %                         |
| Small RNA:                         | 17929                           | 2803112 bp   | 0.25 %                          |
| Satellites:                        | 0                               | 0 bp         | 0.00 %                          |
| Simple repeats:                    | 135224                          | 7066969 bp   | 0.64 %                          |
| Low complexity:                    | 29913                           | 1422099 bp   | 0.13 %                          |

**Table S2.** Number of SNPs under selection using BayeScan [44] ( $Q < 0.01$ ) or cross-population extended haplotype homozygosity (XPEHH) analysis [51,52] ( $-\log_{10} p > 4$ ).  $\alpha$  is BayeScan's locus-specific component of  $F_{ST}$  coefficient [44]. Positive values suggest diversifying selection. Positive XPEHH scores suggest selection in the South group, and negative scores suggest selection in the North group.

| Contig | Total SNPs | BayeScan SNPs | BayeScan region | $\alpha$ | XPEHH SNPs | XPEHH region | XPEHH |
|--------|------------|---------------|-----------------|----------|------------|--------------|-------|
|--------|------------|---------------|-----------------|----------|------------|--------------|-------|

|                |    |   |                      |                   |   |                    |                   |
|----------------|----|---|----------------------|-------------------|---|--------------------|-------------------|
| contig_40523   | 26 | 5 | 103,989 –<br>111,755 | 1.93<br>–<br>2.14 | 0 |                    |                   |
| contig_11164   | 23 | 4 | 60,487 –<br>179,797  | 1.84<br>–<br>2.05 | 0 |                    |                   |
| scaffold_43207 | 11 | 4 | 102,783 –<br>102,811 | 1.70<br>–<br>2.14 | 0 |                    |                   |
| contig_12006   | 10 | 3 | 46,975 –<br>47,031   | 2.09<br>–<br>2.15 | 0 |                    |                   |
| contig_13287   | 10 | 3 | 58,727 –<br>58,738   | 1.68<br>–<br>1.98 | 0 |                    |                   |
| contig_18336   | 20 | 3 | 233,287 –<br>342,618 | 1.90<br>–<br>1.99 | 0 |                    |                   |
| contig_2677    | 22 | 3 | 109,260 –<br>110,069 | 1.79<br>–<br>1.99 | 0 |                    |                   |
| contig_39072   | 10 | 3 | 55,060 –<br>55,126   | 2.06<br>–<br>2.14 | 0 |                    |                   |
| contig_23638   | 6  | 2 | 118,602 –<br>118,616 | 2.08<br>–<br>2.15 | 0 |                    |                   |
| contig_37676   | 17 | 2 | 47,912 –<br>47,954   | 2.01<br>–<br>2.03 | 0 |                    |                   |
| contig_4080    | 13 | 2 | 26,024 –<br>26,027   | 1.78<br>–<br>1.79 | 0 |                    |                   |
| contig_1196    | 24 | 1 | 393,177              | 1.68              | 0 |                    |                   |
| contig_12091   | 3  | 1 | 43,431               | 2.02              | 0 |                    |                   |
| contig_14933   | 7  | 1 | 80,478               | 1.98              | 0 |                    |                   |
| contig_19450   | 6  | 1 | 37,951               | 2.39              | 0 |                    |                   |
| contig_202     | 8  | 1 | 80,251               | 2.03              | 0 |                    |                   |
| contig_20252   | 20 | 1 | 34,278               | 1.87              | 0 |                    |                   |
| contig_205     | 6  | 1 | 28,713               | 2.13              | 0 |                    |                   |
| contig_21253   | 6  | 1 | 43,048               | 1.76              | 0 |                    |                   |
| contig_23312   | 12 | 1 | 171,714              | 1.95              | 0 |                    |                   |
| contig_27115   | 20 | 1 | 111,838              | 1.94              | 0 |                    |                   |
| contig_28985   | 6  | 1 | 22,034               | 2.01              | 0 |                    |                   |
| contig_3057    | 13 | 1 | 272,534              | 1.91              | 0 |                    |                   |
| contig_8456    | 36 | 1 | 88,819               | 1.92              | 0 |                    |                   |
| contig_2544    | 65 | 0 |                      |                   | 3 | 83,144 –<br>83,595 | -6.46 – –<br>5.23 |
